# Supplementary material for: Phytotoxic effects of Acacia saligna dry leachates on germination, seedling growth, photosynthetic performance, and gene expression of economically important crops
Source: PeerJ. 2022 Aug 2;10:e13623. doi: 10.7717/peerj.13623 (PMC9354756; doi:10.7717/peerj.13623)
Supplement: Supplemental Information 1 [file peerj-10-13623-s001.xlsx]

## Sheet: Sheet1
	Germination percentage					Mean germination index
	wheat	Barley	Raphanus sativus	Eruca Sativa		wheat	Barley	Raphanus sativus	Eruca Sativa
Control	97.33	82.3	97.6	93		18.82	16.34	16.75	12.42
Control	97.33	82.3	97.6	93		18.47	16.296	16.71	12.4
Control	98	86	98	96.33		19.17	16.384	16.79	12.44
5% SE	93.33	72.6	94	86.3		16.49	15.5	15.83	10.58
5% SE	93.33	72.6	94	86.3		16.464	15.487	15.804	10.554
5% SE	95	74	95.3	90		16.516	15.513	15.856	10.606
10% SE	86.66	69	89.6	81		14.503	14.88	15.31	10.12
10% SE	86.66	69	89.6	81		14.235	14.856	15.268	10.06
10% SE	87	72	92	84.3		14.771	14.904	15.352	10.18
15% SE	83.66	65.6	85.3	75		13.48	14.3	14.75	9.83
15% SE	83.66	65.6	85.3	75		13.452	14.274	14.71	9.8
15% SE	86	67	86.4	77		13.508	14.326	14.79	9.86
20% SE	78	64.3	82	69		12.87	12.62	13.88	9.42
20% SE	78	64.3	82	69		12.804	12.589	13.854	9.394
20% SE	79	66	84.6	71.1		12.936	12.651	13.906	9.446
25% SE	74	56	76	53.3		12.59	11.61	11.86	8.78
25% SE	74	56	76	53.3		12.564	11.584	11.803	8.76
25% SE	77	59	79.3	54.8		12.616	11.636	11.917	8.8
5% LE	93	77.6	88.6	79		14.88	12.9	14.75	9.99
5% LE	93	79.6	88.6	79		14.863	12.876	14.706	9.953
5% LE	96	77.6	90.1			14.897	12.924	14.794	10.027
10% LE	85	71	84.6	76		14.24	12.46	14.16	9.56
10% LE	85	71	84.6	76		14.214	12.427	14.129	9.543
10% LE	89	74	87	77.3		14.266	12.493	14.191	9.577
15% LE	81.33	62.3	79.3	62.6		13.6	11.73	12.63	9.16
15% LE	81.33	62.3	79.3	62.6		13.376	11.693	12.599	9.136
15% LE	83	66	80.4	63.7		13.824	11.767	12.661	9.184
20% LE	77.66	53.6	77.3	59.3		12.65	9.87	11.3	8.72
20% LE	77.66	53.6	77.3	59.3		12.542	9.844	11.272	8.647
20% LE	79	57	80.4	62.1		12.758	9.896	11.328	8.793
25% LE	73.66	51.3	71	40		11.85	9.013	10.85	8.31
25% LE	73.66	51.3	71	40		11.79	8.991	10.826	8.293
25% LE	75	55	73	42.6		11.91	9.035	10.874	8.327

## Sheet: Sheet2
Treatments			seedling height					fresh wt					Dry wt
A. saligna concentrations
g/L		wheat	Barley	Raphanus sativus	Eruca Sativa		wheat	Barley	Raphanus sativus	Eruca Sativa		wheat	Barley	Raphanus sativus	Eruca Sativa
	C	32	21	17	16		1310	1192	752	172		314	305	157	32
Control	C	29	23	16	15		1315	1186	746	167		310	296	156	30
	C	31	20	17	15		1312	1195	751	171		309	301	160	33
	5 g/L	27	18	15	14		1276	1166	725	156		295	285	144	19
	5 g/L	28	17	14	13		1281	1163	721	152		291	291	147	26
A. Saligna	5 g/L	29	19	15	16		1277	1172	723	152		289	290	142	24
stem	10 g/L	26	15	14	14		1264	1152	710	141		264	275	134	18
extract	10 g/L	22	17	14	12		1261	1148	706	138		271	274	140	19
	10 g/L	25	16	13	13		1259	1143	704	135		268	268	135	18
	15 g/L	23	15	14	12		1245	1137	684	127		283	277	128	15
	15 g/L	25	15	12	11		1243	1133	688	124		277	275	125	16
	15 g/L	19	13	12	12		1247	1135	691	122		268	279	119	16
	20 g/L	20	12	13	10		1236	1131	666	121		251	146	88	13
	20 g/L	21	13	12	11		1237	1125	660	116		248	138	89	14
	20 g/L	23	10	11	9		1230	1119	658	114		246	133	91	12
	25 g/L	19	12	11	5		1219	1114	634	106		227	116	55	7
	25 g/L	21	11	10	6		1222	1116	639	108		226	121	61	9
	25 g/L	17	9	11	7		1217	1110	641	105		221	111	58	9
	5 g/L	28	16	14	12		1166	1076	680	146.3		248	227	131	22
	5 g/L	24	15	13	12		1170	1081	677	146.3		244	224	132	23
	5 g/L	27	17	14	14		1168	1083	685	146.3		251	230	135	21
	10 g/L	21	14	13	12		1088	1041	632	135.4		238	212	118	18
A. Saligna	10 g/L	24	16	12	10		1082	1045	637	135.4		234	209	116	14
Leaf	10 g/L	20	13	13	13		1091	1037	629	135.4		240	207	117	16
extract	15 g/L	22	12	11	10		1023	986	586	123.3		216	187	98	14
	15 g/L	18	14	12	11		1033	979	592	123.3		214	182	94	14
	15 g/L	24	13	10	9		1028	985	591	123.3		218	189	91	17
	20 g/L	18	9	11	8		987	925	540	106.2		189	156	80	12
	20 g/L	19	11	11	6		9.82	930	543	106.2		184	152	75	13
	20 g/L	18	10	9	7		991	928	538	106.2		192	149	76	12
	25 g/L	16	8	8	5		952	886	510	91.7		158	121	35	8
	25 g/L	18	7	11	5		954	884	513	91.7		162	127	37	11
	25 g/L	17	9	10	6		963	893	510	91.7		157	120	31	9

## Sheet: Sheet3
Treatments				Water Use Efficiency				Net Photosynthetic Rate						Fv/Fm					Total Chlorophyll
A. saligna concentrations
g/L			wheatWUE	BarleyWUE	Raphanus WUE	Eruca WUE		wheat	Barley	Raphanus sativus	Eruca Sativa		wheat Fv	BarleyFv	Raphanus Fv	Eruca Fv		wheat	Barley	Raphanus sativus	Eruca Sativa
	C		15.65	4.81	6.92	5.62		12.66	10.81	9.71	11.38		0.91	0.83	0.64	0.77		11.54	10.42	7.51	3.51
Control	C		15.66	4.75	6.88	5.61		12.64	10.85	9.64	11.42		0.92	0.82	0.64	0.73		11.6	10.38	7.55	3.56
	C		15.59	4.77	6.83	5.59		12.7	10.92	9.68	11.4		0.94	0.84	0.58	0.75		11.62	10.43	7.53	3.54
	5 g/L		14.71	4.41	6.62	5.37		12.41	10.52	9.42	11.84		0.86	0.75	0.61	0.66		11.62	1038	7.31	3.27
	5 g/L		14.75	4.35	6.54	5.35		12.37	10.54	9.41	11.86		0.85	0.77	0.58	0.62		11.61	10.33	7.31	3.25
A. Saligna	5 g/L		14.72	4.38	6.58	5.31		12.43	10.53	9.44	11.78		0.85	0.76	0.54	0.64		11.65	10.32	7.35	3.21
stem	10 g/L		14.32	4.19	6.37	5.25		12.1	10.33	9.25	12.09		0.75	0.71	0.51	0.61		11.19	10.08	7.08	3.14
extract	10 g/L		14.3	4.17	6.32	5.24		12.11	10.31	9.23	12.08		0.77	0.68	0.49	0.59		11.21	10.12	7.06	3.11
	10 g/L		14.35	4.2	6.28	5.25		12.09	10.28	9.28	12.1		0.76	0.65	0.53	0.62		11.18	10.09	7.11	3.1
	15 g/L		13.98	3.67	6.71	4.9		11.61	9.74	8.83	11.77		0.62	0.61	0.42	0.52		10.98	9.71	6.78	2.88
	15 g/L		13.88	3.64	6.72	4.85		11.65	9.76	8.81	11.75		0.61	0.62	0.41	0.53		10.95	9.75	6.75	2.87
	15 g/L		13.91	3.66	6.77	4.86		11.55	9.81	8.76	11.69		0.61	0.58	0.38	0.57		11.02	9.69	6.71	2.94
	20 g/L		13.55	3.27	5.43	3.58		10.24	9.37	8.44	10.62		0.54	0.54	0.34	0.44		10.71	9.34	6.41	6.66
	20 g/L		13.6	3.21	5.43	3.61		10.23	9.34	8.46	10.65		0.59	0.53	0.38	0.45		10.65	9.38	6.4	2.64
	20 g/L		13.54	3.24	5.38	3.66		10.18	9.29	8.41	10.62		0.51	0.52	0.33	0.44		10.72	9.4	6.29	6.61
	25 g/L		13.27	2.94	4.45	2.86		9.82	9.1	7.35	9.94		0.51	0.51	0.29	0.35		10.4	9.21	6.18	2.51
	25 g/L		13.29	2.97	4.48	2.88		9.78	9.11	7.34	9.98		0.47	0.52	0.27	0.32		10.42	9.22	6.19	2.55
	25 g/L		13.24	3.05	4.51	2.9		9.77	9.11	7.39	9.91		0.46	0.54	0.28	0.38		10.43	9.18	6.19	2.54
	5 g/L		13.64	3.98	6.12	5.08		12.12	9.87	9.15	11.41		0.78	0.71	0.45	0.58		11.02	10.05	7.14	3.05
	5 g/L		13.71	3.92	6.14	5.1		12.18	9.85	9.14	11.43		0.76	0.73	0.46	0.57		11.08	10.08	7.12	3.07
	5 g/L		13.72	3.89	6.1	5.12		12.15	9.91	9.21	11.38		0.76	0.68	0.41	0.56		11.09	10.11	7.18	3.1
	10 g/L		13.21	3.08	5.89	4.78		11.95	9.35	9.02	11.12		0.71	0.62	0.37	0.51		10.78	9.87	6.88	2.97
A. Saligna	10 g/L		13.2	3.12	5.84	4.75		11.96	9.31	9.04	11.15		0.7	0.61	0.35	0.49		10.81	9.79	6.89	2.92
Leaf	10 g/L		13.26	3.14	5.87	4.76		11.89	9.29	8.95	11.1		0.72	0.6	0.38	0.5		10.82	9.81	6.92	2.89
extract	15 g/L		12.94	2.74	5.46	4.54		11.54	9.07	8.67	10.94		0.62	0.51	0.31	0.42		10.53	9.52	6.45	2.64
	15 g/L		12.97	2.77	5.41	4.53		11.52	9.06	8.64	10.99		0.64	0.52	0.28	0.42		10.64	9.54	6.41	2.66
	15 g/L		12.93	2.81	5.44	4.48		11.53	9.1	8.66	11.02		0.61	0.49	0.27	0.45		10.56	9.6	6.39	2.58
	20 g/L		12.64	2.41	5.13	3.97		10.88	8.78	8.31	10.65		0.55	0.44	0.24	0.38		10.33	9.24	6.12	2.3
	20 g/L		12.62	2.44	5.18	4.05		10.79	8.74	8.28	10.63		0.54	0.46	0.23	0.37		10.37	9.24	6.21	2.34
	20 g/L		12.71	2.4	5.21	4.06		10.86	8.82	8.34	10.58		0.55	0.41	0.25	0.34		10.32	9.26	6.16	2.28
	25 g/L		12.25	2.17	4.67	3.62		10.48	8.34	8.06	10.21		0.42	0.31	0.18	0.26		10.18	9.11	5.78	2.18
	25 g/L		12.3	2.18	4.66	3.64		10.46	8.38	8.12	10.23		0.45	0.28	0.21	0.24		10.16	9.14	5.82	2.12
	25 g/L		12.32	2.21	4.71	3.72		10.52	8.31	8.1	10.18		0.49	0.29	0.21	0.27		10.21	9.09	5.87	2.14

## Sheet: Sheet4
		H2O2				Lipid peroxidation					Electrolytes leakage
	wheat H2O2	Barley H2O2	Raphanus H2O2	Eruca H2O2		wheatMDA	BarleyMDA	Raphanus MDA	Eruca MDA		wheat	Barley	Raphanus sativus	Eruca Sativa
C	9.31	8.21	3.26	2.14		9.21	13.42	8.66	11.31		5.51	7.62	8.66	10.7
C	9.28	8.18	3.2	2.12		9.23	13.45	8.61	11.32		5.48	7.64	8.64	10.68
C	9.3	8.2	3.24	2.11		9.24	13.49	8.62	11.27		5.5	7.68	8.72	10.66
5 g/L	9.41	8.44	3.34	2.45		9.43	13.77	8.38	11.64		5.7	7.88	8.8	10.91
5 g/L	9.43	8.42	3.32	2.41		9.42	13.75	8.34	11.59		5.67	7.84	8.82	10.89
5 g/L	9.44	8.39	3.28	2.44		9.45	13.69	8.31	11.64		5.64	7.91	8.84	10.92
10 g/L	9.78	8.79	3.57	2.81		9.66	14.11	8.12	12.05		5.94	8.12	9.1	11.15
10 g/L	9.76	8.76	3.53	2.83		9.58	14.06	8.16	11.94		5.91	8.06	9.11	11.13
10 g/L	9.71	8.81	3.54	2.78		9.61	14.07	8.14	11.98		5.97	8.07	9.08	110.9
15 g/L	10.34	9.08	3.91	3.25		9.9	13.51	7.94	12.41		6.14	8.59	9.2	10.92
15 g/L	10.32	9.04	3.85	3.23		6.88	13.5	7.89	12.34		6.11	8.55	9.22	10.86
15 g/L	10.3	9.11	3.86	3.21		9.87	13.52	7.92	12.35		6.09	8.52	9.23	10.91
20 g/L	10.58	9.24	4.08	3.46		9.09	12.97	7.66	11.87		6.22	8.41	9.77	10.55
20 g/L	10.56	9.23	4.11	3.42		7.06	12.92	7.64	11.85		6.23	8.37	9.72	10.53
20 g/L	10.6	9.19	4.09	3.39		9.1	12.89	7.71	11.82		6.27	8.35	9.68	10.61
25 g/L	10.82	6.47	4.28	3.66		7.45	12.24	7.3	11.45		6.17	8.24	9.45	10.31
25 g/L	10.81	9.46	4.26	3.67		7.43	12.26	7.27	11.42		6.15	8.29	9.46	10.23
25 g/L	10.78	9.51	4.19	3.62		7.49	12.31	7.3	11.43		6.12	8.19	9.52	10.32
5 g/L	9.87	9.05	3.78	2.87		10.11	14.54	9.12	12.05		5.81	6.07	9.02	11.02
5 g/L	9.89	9.1	3.74	2.89		10.12	14.57	9.14	12.07		5.82	6.08	9.03	11.1
5 g/L	9.91	9.11	3.82	2.84		10.08	14.61	9.08	12.04		5.78	6.07	8.94	10.99
10 g/L	10.12	9.35	4.08	3.05		10.17	14.25	8.74	12.31		6.05	6.54	9.41	11.18
10 g/L	10.24	9.36	4.11	3.08		10.21	14.29	8.76	12.3		6.07	6.55	9.42	11.17
10 g/L	10.25	9.42	4.13	3.05		10.23	14.21	8.8	12.34		6.02	6.51	9.37	11.21
15 g/L	10.45	9.75	4.34	3.34		9.88	13.89	8.54	11.97		6.21	7.02	9.75	11.41
15 g/L	10.41	9.78	4.28	3.35		9.89	13.94	8.56	11.95		6.25	7.08	9.81	11.37
15 g/L	10.46	9.67	4.31	3.29		9.85	13.87	8.52	11.96		6.27	6.89	9.8	11.44
20 g/L	10.94	9.98	4.86	3.55		9.65	13.45	8.21	11.55		6.47	7.23	10.06	11.67
20 g/L	10.97	9.97	4.89	3.59		9.64	13.47	8.19	11.6		6.41	7.28	10.07	11.7
20 g/L	10.89	10.02	4..91	3.51		9.71	13.44	8.18	11.57		6.45	7.21	10.2	11.72
25 g/L	11.08	10.54	5.14	3.78		9.34	13.21	8.02	11.33		6.94	7.66	10.44	12.02
25 g/L	11.12	10.58	5.18	3.74		9.36	13.18	8.04	11.32		6.97	7.61	10.37	12.04
25 g/L	11.13	10.61	5.06	3.79		9.31	13.16	8.02	11.35		6.88	7.71	10.38	11.89

## Sheet: Sheet5
Treatments			Proline					Total protein					Total soluble sugar
A. saligna concentrations
g/L		wheat	Barley	Raphanus sativus	Eruca Sativa		wheat	Barley	Raphanus sativus	Eruca Sativa		wheat	Barley	Raphanus sativus	Eruca Sativa
	C	6.91	11.68	21.31	19.66		11.25	9.82	21.61	3.67		30.44	33.01	12.66
Control	C	6.9	11.64	21.35	19.64		11.23	9.84	21.64	3.64		30.45	33.12	12.64	8.26
	C	6.92	11.7	21.28	19.71		11.19	9.85	21.64	3.61		30.48	33.08	12.61
	5 g/L	6.66	11.35	21.15	19.41		11.15	9.67	19.74	3.44		28.64	32.54	12.34
	5 g/L	6.64	11.32	21.14	19.37		11.12	9.64	19.76	3.42		28.61	32.58	12.3	8.04
A. Saligna	5 g/L	6.67	11.28	21.11	19.38		11.1	9.71	19.79	3.41		28.66	32.55	12.28
stem	10 g/L	6.35	11.15	20.94	18.83		11.03	9.37	19.54	3.28		27.48	29.7	12.12
extract	10 g/L	6.32	11.14	20.96	18.83		11.02	9.32	19.55	3.26		27.51	29.76	12.04	7.89
	10 g/L	6.31	11.08	21.02	18.79		10.89	9.28	19.61	3.31		27.44	29.68	12.08
	15 g/L	6.07	10.85	20.77	18.45		10.61	9.14	19.33	3.02		27.24	28.71	11.77
	15 g/L	6.08	10.89	20.69	18.42		10.57	9.11	19.28	2.97		27.31	28.76	11.76	7.53
	15 g/L	6.1	10.92	20.75	18.38		10.55	9.16	19.34	3.04		27.19	28.73	11.71
	20 g/L	5.85	10.55	20.44	18.55		10.33	8.84	19.45	2.6		26.77	28.37	11.41
	20 g/L	5.83	10.53	20.38	18.53		10.32	8.86	19.41	2.62		26.87	28.33	11.39	7.24
	20 g/L	5.89	10.62	20.43	18.49		10.27	8.86	19.38	2.58		26.79	28.32	11.42
	25 g/L	5.4	10.31	20.18	18.19		10.17	8.66	19.12	2.48		26.41	27.88	11.15
	25 g/L	5.37	10.28	20.16	18.18		10.15	8.64	19.1	2.46		26.4	27.91	11.16	6.9
	25 g/L	5.35	10.29	21.13	18.2		10.18	8.71	19.08	2.41		26.35	27.86	11.18
	5 g/L	6.21	10.89	20.87	19.08		10.57	9.41	18.64	3.24		27.48	29.48	12.08
	5 g/L	6.22	10.88	20.89	19.12		10.61	9.4	18.66	3.26		27.51	29.51	12.12
	5 g/L	6.18	10.91	20.91	19.05		10.55	9.35	18.72	3.21		27.53	29.53	12.04
	10 g/L	6.02	10.64	20.61	18.57		10.26	9.18	18.24	3.08		27.21	29.18	11.89
A. Saligna	10 g/L	6.01	10.67	20.65	18.55		10.28	9.12	18.23	3.12		27.25	29.21	11.88
Leaf	10 g/L	6.4	10.7	20.58	18.61		10.21	9.15	18.31	3.1		27.31	29.23	11.79
extract	15 g/L	5.88	10.33	20.18	18.34		10.11	8.68	16.87	2.99		26.87	29.05	11.61
	15 g/L	5.79	10.34	20.17	18.38		10.12	8.71	16.88	2.87		26.85	29.07	11.6
	15 g/L	5.81	10.27	20.14	18.31		10.11	8.64	16.89	2.86		26.88	29.03	11.65
	20 g/L	5.45	10.02	19.98	18.08		10	8.25	16.35	2.41		26.45	28.87	11.23
	20 g/L	5.47	10.05	20.02	18.07		9.98	8.31	16.33	2.45		26.47	28.89	11.28
	20 g/L	5.41	9.98	19.97	18.12		10.02	8.28	16.28	2.38		26.41	28.85	11.24
	25 g/L	5.12	9.67	19.64	17.87		9.78	8.11	16.12	2.17		26.21	28.54	11.08
	25 g/L	5.18	9.71	19.67	17.88		9.77	8.14	16.17	2.19		26.19	28.53	11.07
	25 g/L	5.2	9.66	19.72	17.95		9.81	8.17	16.08	2.18		26.23	28.61	11.08

## Sheet: Sheet6
Treatments					CAT					SOD					APOX
A. saligna concentrations
g/L				wheat	Barley	Raphanus sativus	Eruca Sativa		wheat	Barley	Raphanus sativus	Eruca Sativa		wheat	Barley	Raphanus sativus	Eruca Sativa
	C			21.72	25.64	16.82	33.75		14.62	15.64	6.44	13.52		4.16	5.74	3.81	2.89
Control	C			21.7	25.61	16.84	33.81		14.65	15.59	6.45	16.54		4.12	5.76	3.75	2.91
	C			21.81	25.63	16.86	33.74		14.6	1562	6.45	16.61		4.08	5.71	3.84	2.93
	5 g/L			32.51	38.64	17.12	37.4		14.96	15.88	7.21	17.82		3.87	4.92	3.55	2.75
	5 g/L			32.5	38.61	17.06	37.45		14.94	15.77	7.23	17.86		3.92	4.86	3.45	2.77
A. Saligna	5 g/L			32.55	36.6	17.1	37.41		14.98	15.81	7.2	17.78		3.86	4.97	3.51	2.74
stem	10 g/L			41.67	53.62	17.33	46.21		16.55	16.44	7.81	18.82		3.65	4.66	3.27	2.51
extract	10 g/L			41.6	53.71	17.32	46.2		16.52	16.52	7.83	18.82		3.61	4.62	3.31	2.46
	10 g/L			41.71	53.73	17.35	46.27		16.61	16.48	7.79	18.91		3.59	4.71	3.29	2.47
	15 g/L			37.66	61.31	18.42	51.52		18.66	17.55	8.64	20.31		4.67	4.33	3.16	2.55
	15 g/L			37.61	61.28	18.46	51.61		18.6	17.54	8.6	20.35		4.65	4.3	3.15	2.56
	15 g/L			37.72	31.19	18.38	51.63		18.58	17.56	8.66	20.29		4.62	4.35	3.08	2.61
	20 g/L			25.91	54.72	18.27	45.19		22.1	17.31	8.35	19.42		5.62	4.18	2.89	2.11
	20 g/L			25.92	54.77	18.31	45.17		22.05	17.32	8.31	19.42		5.71	4.14	2.95	2.04
	20 g/L			25.98	54.71	18.25	45.21		22.11	17.28	8.35	19.45		5.72	4.12	2.94	2.02
	25 g/L			19.82	44.82	17.91	39.25		21.85	18.41	7.41	8.64		5.31	3.89	2.62	2.25
	25 g/L			19.86	44.82	17.88	39.29		21.8	18.43	7.45	8.66		5.22	3.87	2.58	2.21
	25 g/L			19.84	44.76	17.92	39.21		21.87	18.24	7.51	8.62		5.28	3.78	2.59	2.24
	5 g/L			35.55	41.25	18.21	36.54		15.21	16.24	7.38	16.88		4.02	4.32	3.78	3.01
	5 g/L			35.52	41.27	18.15	36.55		15.24	16.25	7.43	16.89		4.12	4.33	3.81	3.06
	5 g/L			35.61	41.21	18.16	36.61		15.18	16.22	7.44	16.75		4.06	4.35	3.8	3.02
	10 g/L			51.32	38.64	18.45	48.65		16.77	17.65	7.89	18.21		4.18	4.08	3.5	2.91
A. Saligna	10 g/L			51.36	38.61	18.44	48.68		16.81	17.69	7.91	18.19		4.21	4.12	3.56	2.87
Leaf	10 g/L			51.34	38.72	18.51	48.71		16.79	17.71	7.92	18.23		4.15	4.05	3.51	2.82
extract	15 g/L			27.25	29.34	18.32	49.31		18.24	18.21	8.21	18.64		4.54	3.94	3.45	2.56
	15 g/L			27.27	29.38	18.33	49.37		18.29	18.26	8.23	18.68		4.61	3.95	3.47	2.54
	15 g/L			27.26	29.27	18.29	49.36		18.21	18.31	8.27	18.72		4.6	3.9	3.41	2.55
	20 g/L			22.34	25.16	17.87	44.54		23.12	19.55	8.54	19.05		4.87	3.75	3.24	2.26
	20 g/L			22.36	25.18	17.85	44.5		23.1	19.51	8.56	19.02		4.88	3.77	3.25	2.28
	20 g/L			22.28	25.21	17.92	44.51		23.18	19.6	8.52	19.04		4.76	3.81	3.21	2.21
	25 g/L			18.31	21.54	17.45	37.21		23.33	19.81	9.1	19.33		4.98	3.54	2.89	2.05
	25 g/L			18.18	21.57	17.41	37.25		23.34	19.85	9.12	19.32		5.02	3.61	2.81	2.12
	25 g/L			18.25	21.48	17.52	37.39		23.3	19.8	9.05	19.41		4.96	3.56	2.83	2.04

## Sheet: Sheet7
Treatments					Total phenol Content					Total flavonoids content
A. saligna concentrations
g/L				wheat	Barley	Raphanus sativus	Eruca Sativa		wheat	Barley	Raphanus sativus	Eruca Sativa
	C			31.62	24.31	8.77	12.64		1.94	1.25	0.89	1.15
Control	C			31.64	24.3	8.75	12.6		1.92	1.24	0.87	1.12
	C			31.66	24.28	8.81	12.67		1.91	1.27	0.85	1.14
	5 g/L			32.1	24.18	8.51	12.4		1.77	1.19	0.62	1.1
	5 g/L			32.07	24.21	8.43	12.37		1.72	1.18	0.65	1.04
A. Saligna	5 g/L			32.11	24.24	8.52	12.35		1.75	1.21	0.67	1.08
stem	10 g/L			31.55	23.87	8.14	12.18		1.51	1.1	0.51	0.89
extract	10 g/L			31.52	23.88	8.12	12.16		1.53	1.08	0.54	0.88
	10 g/L			31.54	23.89	8.15	12.23		1.56	1.07	0.59	0.92
	15 g/L			30.88	23.62	8.35	11.88		1.17	1.12	0.44	0.66
	15 g/L			30.87	23.66	8.34	11.86		1.15	1.11	0.48	0.63
	15 g/L			30.91	23.59	8.3	11.96		1.14	1.07	0.43	0.6
	20 g/L			30.4	23.41	7.91	11.55		1.25	0.95	0.52	0.51
	20 g/L			30.43	23.37	7.92	11.53		1.23	0.97	0.5	0.49
	20 g/L			30.38	23.38	7.93	11.49		1.19	0.99	0.53	0.52
	25 g/L			30.14	22.88	7.61	10.52		1.07	0.88	0.38	0.44
	25 g/L			30.12	22.9	7.56	10.49		1.05	0.86	0.37	0.48
	25 g/L			30.15	22.91	7.64	10.51		1.012	0.84	0.31	0.46
	5 g/L			30.57	23.54	8.37	10.32		1.43	1.06	0.55	0.89
	5 g/L			30.55	23.55	8.41	10.35		1.48	1.08	0.51	0.85
	5 g/L			30.62	23.6	8.36	10.33		1.42	1.02	0.58	0.91
	10 g/L			30.71	23.19	8.27	10.21		1.26	0.88	0.34	0.67
A. Saligna	10 g/L			30.78	23.21	8.29	10.19		1.25	0.87	0.36	0.65
Leaf	10 g/L			30.75	23.15	8.31	10.18		1.24	0.85	0.41	0.7
extract	15 g/L			29.87	23.08	8.16	9.98		1.05	0.64	0.21	0.45
	15 g/L			29.88	23.1	8.15	10.02		1.08	0.66	0.25	0.42
	15 g/L			29.84	23.11	8.21	9.95		1.02	0.67	0.19	0.5
	20 g/L			29.35	22.98	8.02	9.64		0.98	0.34	0.18	0.25
	20 g/L			29.33	22.97	8.1	9.66		0.95	0.35	0.16	0.24
	20 g/L			29.37	22.89	8.07	9.62		1.03	0.38	0.22	0.23
	25 g/L			29.18	22.61	7.78	9.28		0.65	0.28	0.11	0.13
	25 g/L			29.19	22.64	7.81	9.26		0.62	0.24	0.15	0.11
	25 g/L			29.21	22.58	7.75	9.31		0.71	0.26	0.13	0.16

## Sheet: Sheet8
					Gene expression analysis in T. aestivum, H. vulgare, R. sativu and E. Sativa plants treated with 25% aqueous extract of A. saligna leaves, after 6 days of treatment (DAT)
									GENE 2					GENE 3
				GENE 1
				CYP72A gene					CYP81A gene					GST gene
			wheat	Barley	Raphanus sativus	Eruca Sativa		wheat	Barley	Raphanus sativus	Eruca Sativa		wheat	Barley	Raphanus sativus	Eruca Sativa
	Control (C)		1.25	1.38	1.24	1.54		1.52	1.62	1.2	1.53		1.42	1.72	1.14	1.75
	25% A. saligna leaves		3.76	2.84	2.28	5.24		3.18	2.64	2.13	3.82		3.22	2.49	1.98	3.4
	β-Actin (Referebce)		1.05	1.1	0.98	0.98		1.012	0.97	1.1	1.13		0.97	1.21	1.11	0.98
													CYP81A gene							GST gene
				CYP72A gene
